# Supplementary material
Source: Research Square preprint supplement (doi:10.21203/rs.3.rs-8650761/v1)
Supplement: Supplementary file 1 [file f3d3e4a0d00262b13687de23.docx]

Supplementary materials S1

The Attachment to God Inventory - Shorten Czech version

Please indicate the extent to which you agree with the following statements.

1 2 3 4 5 6 7

Disagree Neutral/Mixed Agree

Strongly Strongly

1. I prefer not to depend too much on God.
2. I just don’t feel a deep need to be close to God.
3. I am uncomfortable allowing God to control every aspect of my life.
4. I worry a lot about damaging my relationship with God.
5. I often worry about whether God is pleased with me.
6. I fear God does not accept me when I do wrong.
7. I often feel angry with God for not responding to me when I want.
